# Psychiatric Services

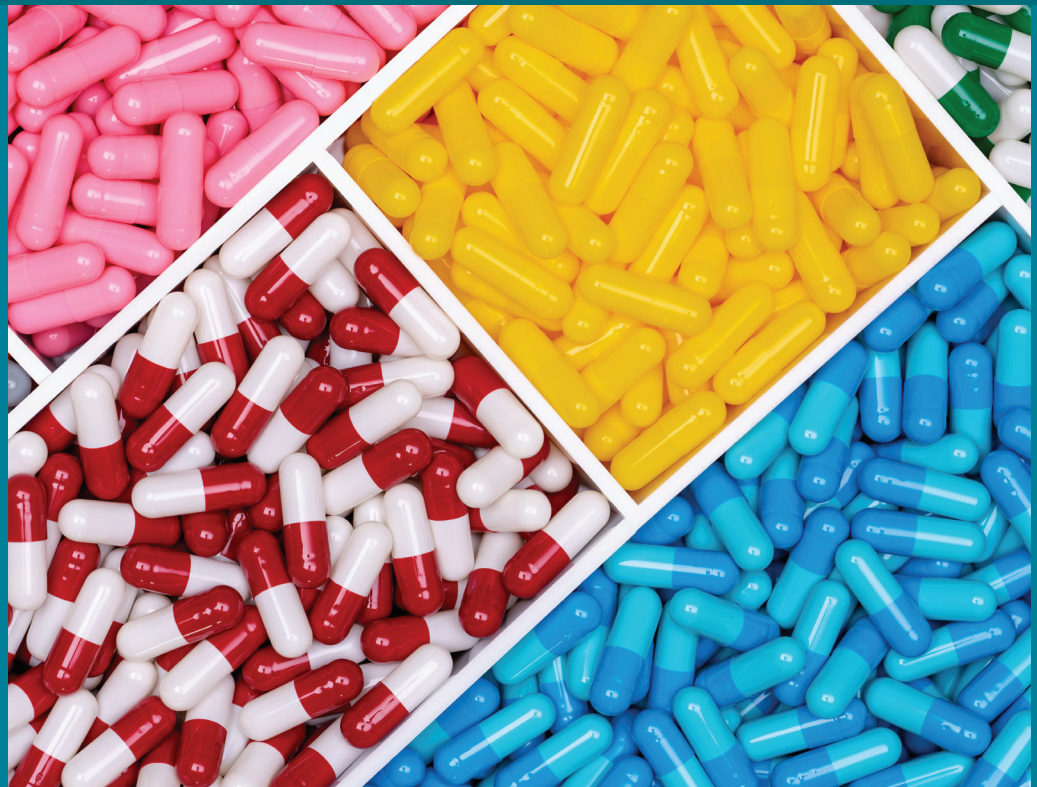

Off-label gabapentin use by U.S. adults for psychiatric indications  
Improving physical health among people with serious mental illness  
The continuing decline of clinical research on serious mental illnesses at NIMH  
Ethical considerations for welfare checks by police
